# Supplementary material for: White Matter in Schizophrenia Treatment Resistance
Source: Atypon-hosted journal article supplement (doi:10.1176/appi.ajp.2019.18101212), 2019-07-29
Supplement: appi.ajp.2019.18101212.ds001.pdf [file appi.ajp.2019.18101212.ds001.pdf]

 


Psychiatry Online
